# Supplementary material for: CADA: phenotype-driven gene prioritization based on a case-enriched knowledge graph
Source: PubMed Central journal article supplement — NAR Genom Bioinform. 2021 Sep 3;3(3):lqab078. doi: 10.1093/nargab/lqab078 (PMC8415429; doi:10.1093/nargab/lqab078), 2021-09-03
Supplement: lqab078_supplemental_file.pdf [file lqab078_supplemental_file.pdf]

# CADA - Supplementary Material

| Graphs    | Dimensions | Walk length | Number of walks | Window size | p     | q     |
|-----------|------------|-------------|-----------------|-------------|-------|-------|
| $G_0$     | 200        | 60          | 10              | 4           | 0.978 | 1.740 |
| $G_{25}$  | 140        | 30          | 16              | 5           | 1.125 | 3.923 |
| $G_{50}$  | 120        | 20          | 32              | 6           | 0.368 | 3.509 |
| $G_{75}$  | 140        | 40          | 16              | 6           | 0.358 | 3.422 |
| $G_{100}$ | 300        | 60          | 10              | 4           | 1.799 | 3.875 |

**Supplementary table 1. Optimized hyperparameters in Node2vec across five graphs**

| Graphs    | Top1     |                | Top5     |                | Top10    |                | Top50    |                | Top100   |                |
|-----------|----------|----------------|----------|----------------|----------|----------------|----------|----------------|----------|----------------|
|           | accuracy | interval       |
| $G_0$     | 8.6%     | [8.3%, 8.8%]   | 20.1%    | [19.5%, 20.6%] | 26.6%    | [25.8%, 27.3%] | 47.2%    | [46.5%, 47.9%] | 57.6%    | [56.9%, 58.3%] |
| $G_{25}$  | 11.2%    | [10.6%, 11.8%] | 22.7%    | [22.4%, 23.0%] | 29.3%    | [28.9%, 29.8%] | 49.6%    | [49.3%, 49.9%] | 60.1%    | [59.8%, 60.4%] |
| $G_{50}$  | 12.8%    | [12.2%, 13.3%] | 26.1%    | [25.6%, 26.5%] | 32.6%    | [32.1%, 33.0%] | 52.6%    | [52.0%, 53.2%] | 62.9%    | [62.4%, 63.3%] |
| $G_{75}$  | 14.3%    | [13.8%, 14.9%] | 28.1%    | [27.4%, 28.8%] | 34.9%    | [34.6%, 35.3%] | 54.7%    | [54.2%, 55.1%] | 64.4%    | [63.9%, 64.9%] |
| $G_{100}$ | 14.9%    | [14.4%, 15.4%] | 28.0%    | [27.4%, 28.5%] | 34.9%    | [34.5%, 35.3%] | 54.9%    | [54.5%, 55.3%] | 65.0%    | [64.3%, 65.6%] |

**Supplementary table 2. Validation accuracy values and 95% confidence intervals during the graph extension.** The values and the 95% confidence intervals are computed from 10 repeated embeddings per graph.
